# Supplementary material for: Quantitative proteomics and transcriptomics of potato in response to Phytophthora infestans in compatible and incompatible interactions
Source: PubMed Central journal article supplement (PMC4079953; doi:10.1186/1471-2164-15-497), 2014-06-19
Supplement: 12864_2014_6185_MOESM1_ESM.pdf [file 12864_2014_6185_MOESM1_ESM.pdf]

Table S1: Predicted ORFs based on RNA-seq data in Desirée, Sarpo Mira and SW93-1015.

| <b>Cultivar</b> | <b>Number of contigs</b> | <b>Number of transcripts predicted by Trinity</b> | <b>No significant blast hits in Phureja proteome</b> | <b>Number of peptides identified (Phureja)</b> | <b>Peptides (Phureja+ Uniprot)</b> | <b>Unique Peptides (Phureja + RNA seq)</b> |
|-----------------|--------------------------|---------------------------------------------------|------------------------------------------------------|------------------------------------------------|------------------------------------|--------------------------------------------|
| Desiree         | 97794                    | 36925                                             | 3569                                                 | 8675                                           | 9036                               | 10432                                      |
| Sarpo Mira      | 96153                    | 36353                                             | 3521                                                 |                                                |                                    |                                            |
| SW93-1015       | 91370                    | 35059                                             | 3544                                                 |                                                |                                    |                                            |
