# Supplementary material for: Quantitative proteomics and transcriptomics of potato in response to Phytophthora infestans in compatible and incompatible interactions
Source: PubMed Central journal article supplement (PMC4079953; doi:10.1186/1471-2164-15-497), 2014-06-19
Supplement: 12864_2014_6185_MOESM4_ESM.pdf [file 12864_2014_6185_MOESM4_ESM.pdf]

Supporting Information Figure S1: **Total peptide intensity for proteases and peptidases. a**, Sum of total intensities of 49 proteins in the secretome identified as glucanases and glucosidases (4 replicates) **b**, Sum of total intensities of 78 proteins in the secretome identified as Proteases and carboxypeptidases (4 replicates). Error bars indicated  $\pm$ SD of the mean.

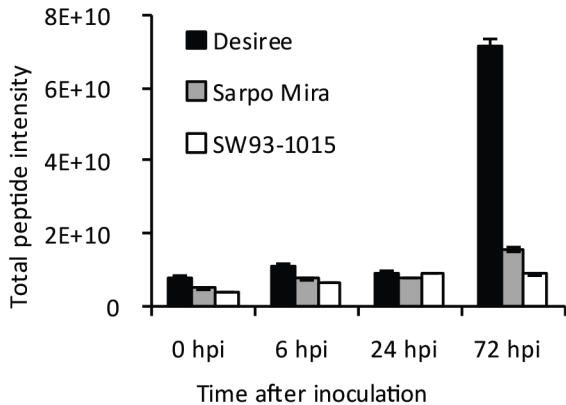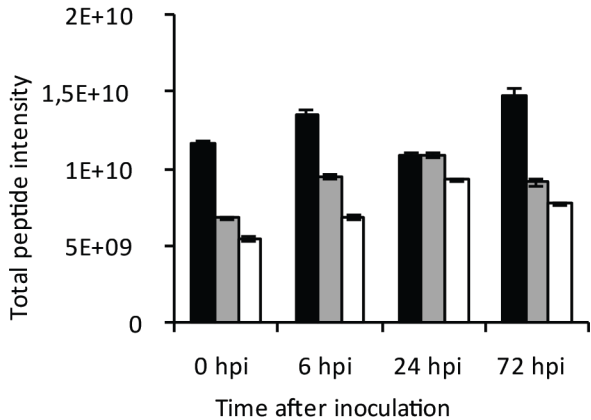

Supporting Information Figure S2: **Functional analysis of gene expression by MapMan.** Bins for genes related to hormones (a) and transcription (b) for Desirée, Sarpo Mira and SW-1015 at 6, 24 or 72 hpi with an adjusted p-value of  $<0.05$  are shown.

# Desiree – transcription factors

6 h

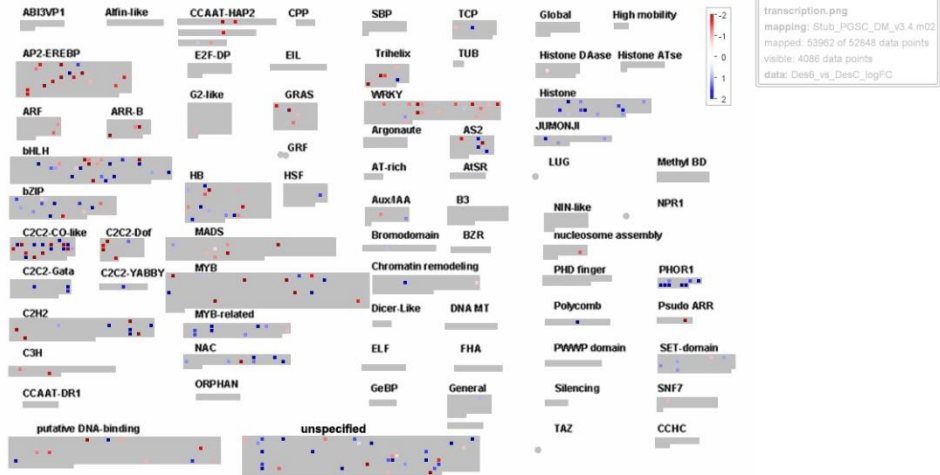

24 h

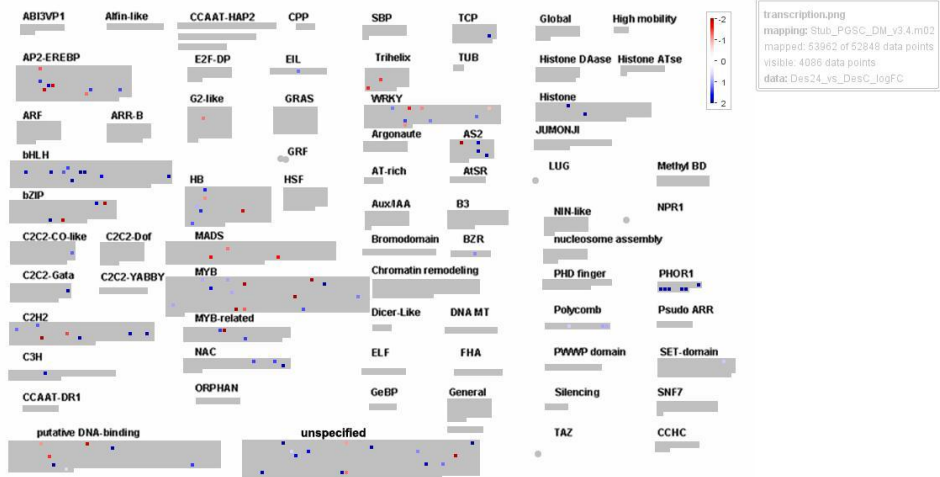

72 h

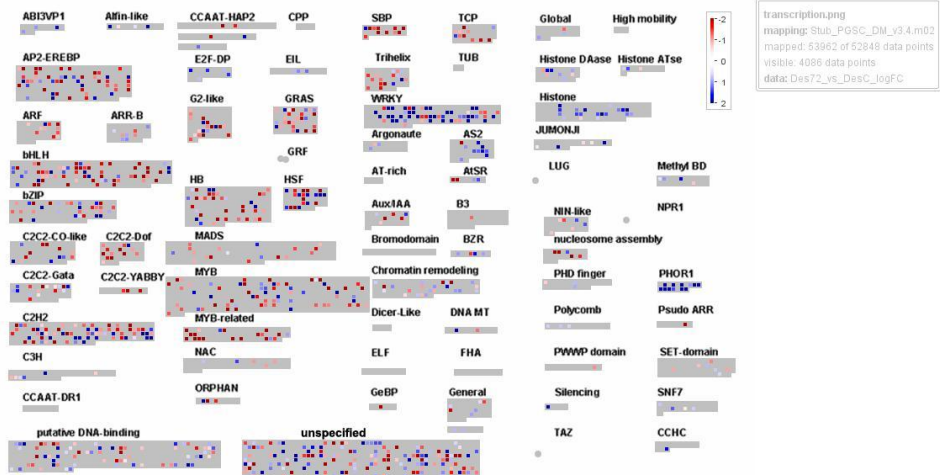

# Sarpo Mira – transcription factors

6 h

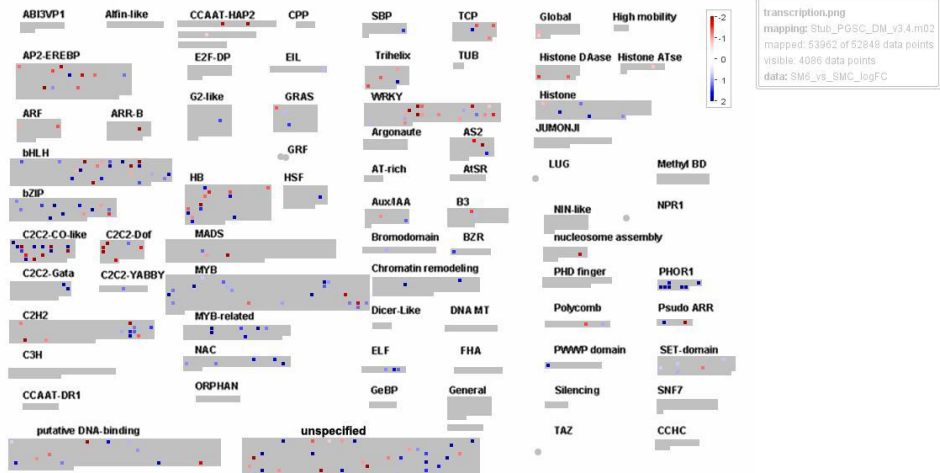

24 h

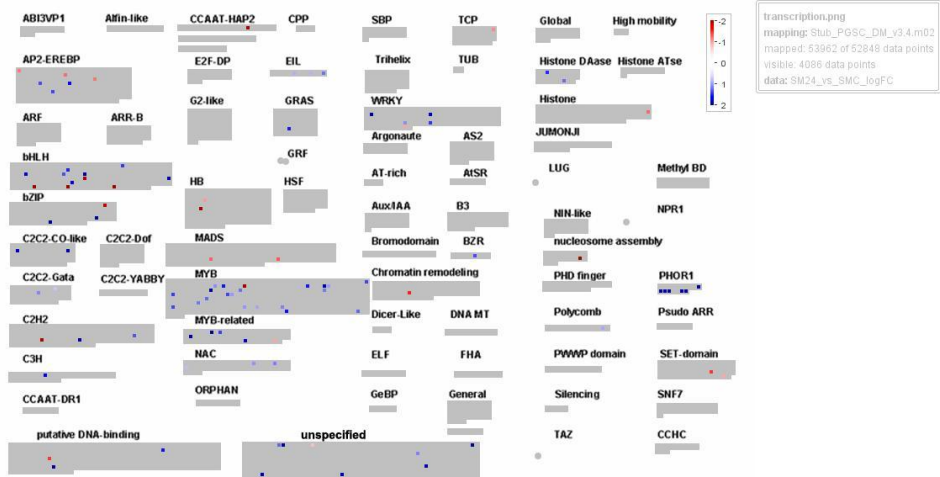

72 h

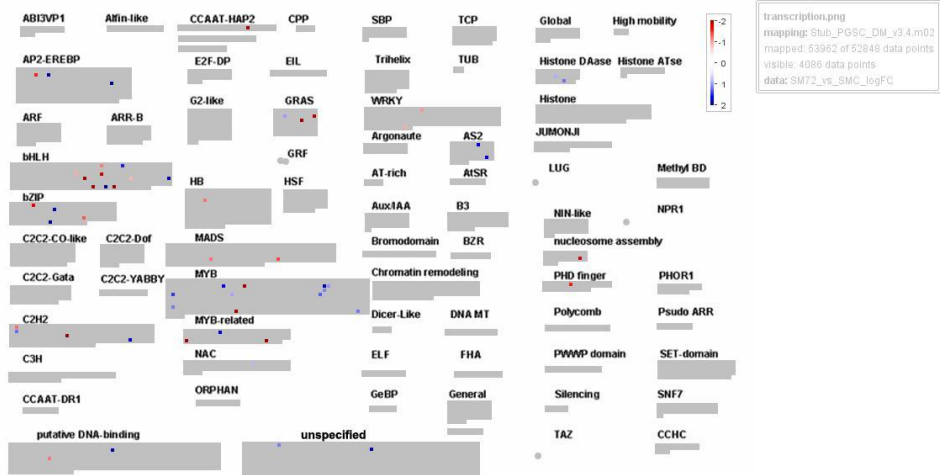

# SW-1015 – transcription factors

6 h

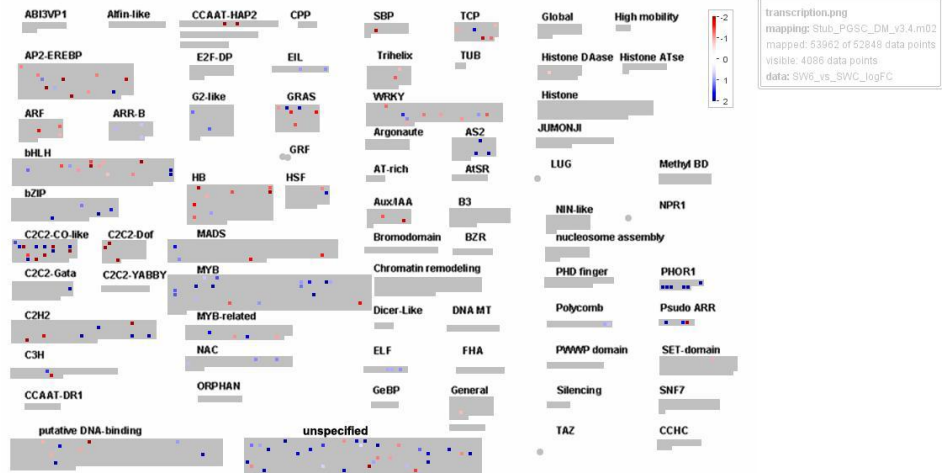

24 h

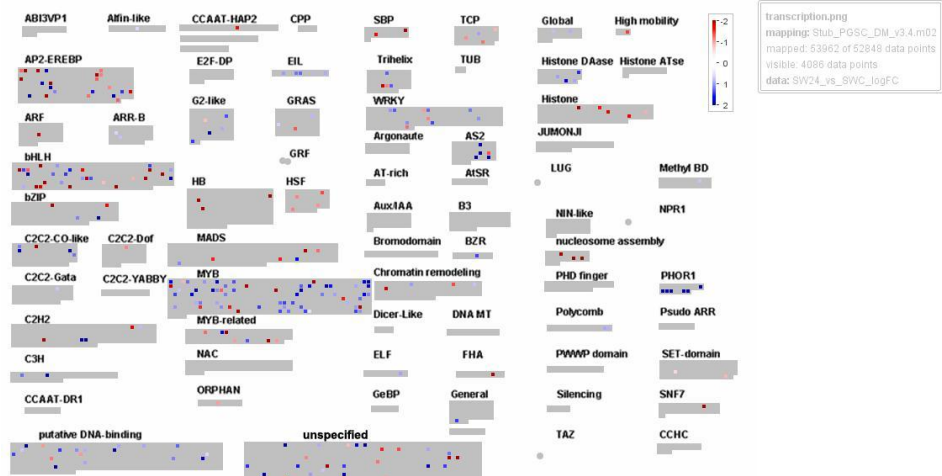

72 h

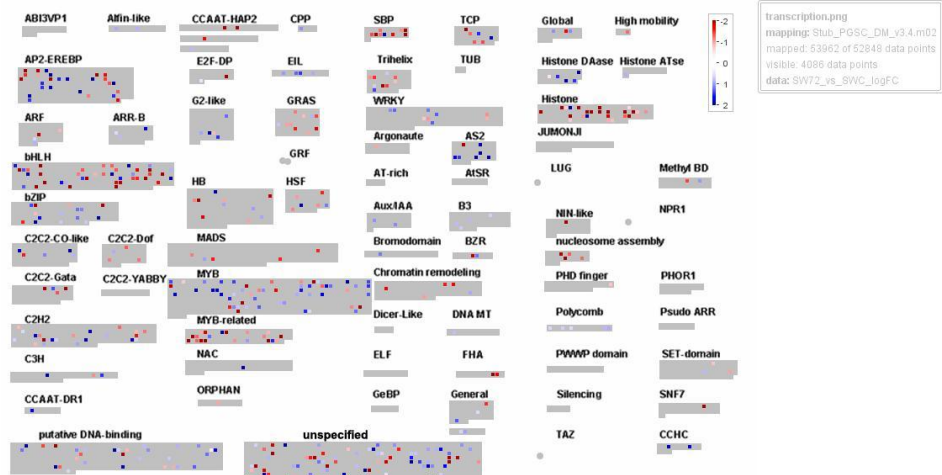

Desiree – hormones and signalling

6hpi

24hpi

72hpi

Regulation\_overview.png  
mapping: Stub\_PGSC\_DM\_v3.4.m02  
mapped: 53962 of 52848 data points  
visible: 12202 data points  
data: Des6\_vs\_DesC\_logFC

Regulation\_overview.png  
mapping: Stub\_PGSC\_DM\_v3.4.m02  
mapped: 53962 of 52848 data points  
visible: 12202 data points  
data: Des24\_vs\_DesC\_logFC

Regulation\_overview.png  
mapping: Stub\_PGSC\_DM\_v3.4.m02  
mapped: 53962 of 52848 data points  
visible: 12202 data points  
data: Des72\_vs\_DesC\_logFC

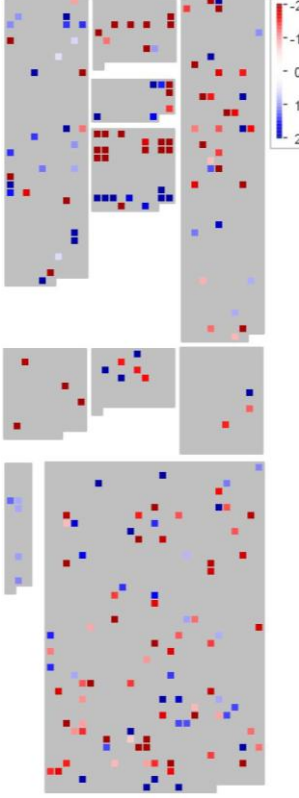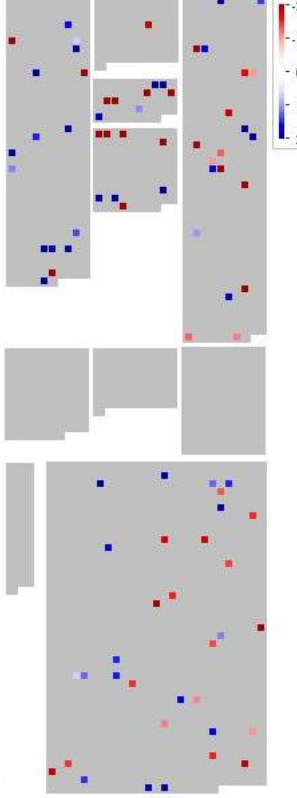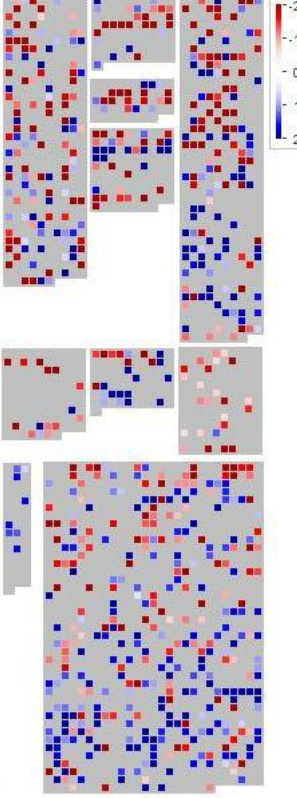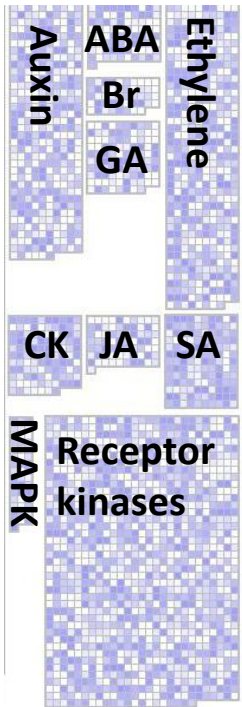

ABA, abscisic acid  
BR, brassinosteroids  
GA, gibberellic acid  
CK, cytokinin  
JA, jasmonic acid  
SA, salicylic acid  
MAPK, Mitogen-Activated Protein Kinase

# Sarpo Mira – hormones and signalling

6hpi

24hpi

72hpi

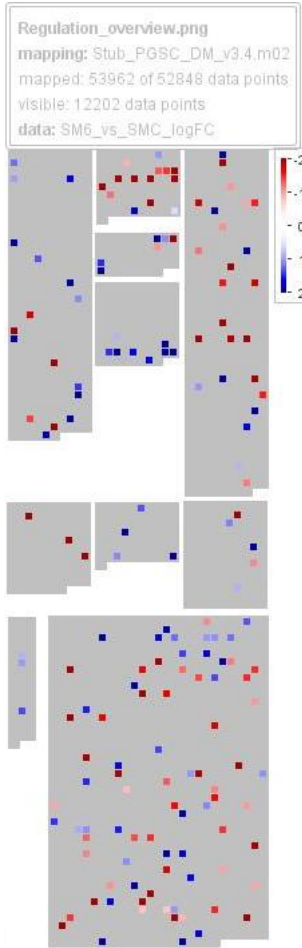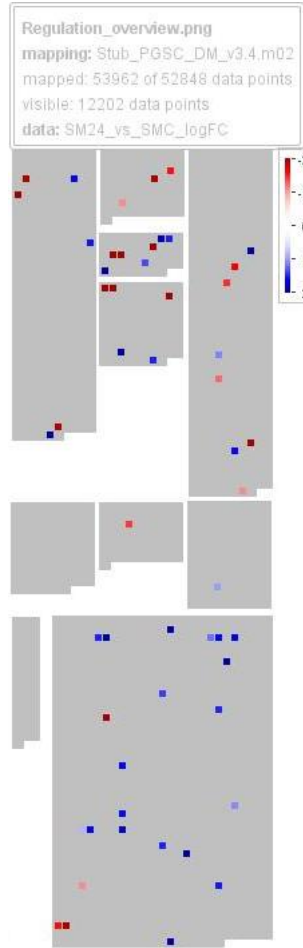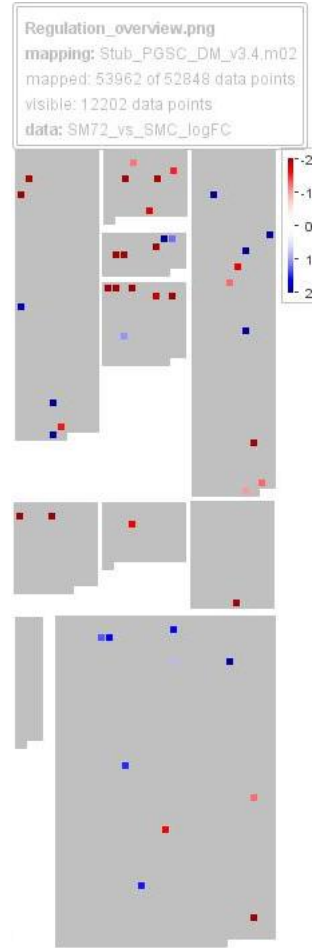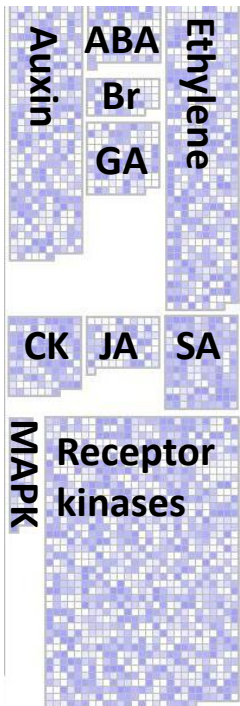

ABA, abscisic acid  
 BR, brassinosteroids  
 GA, giberellic acid  
 CK, cytokinin  
 JA, jasmonic acid  
 SA, salicylic acid  
 MAPK, Mitogen-Activated Protein Kinase
