# Supplementary material for: Quantitative proteomics and transcriptomics of potato in response to Phytophthora infestans in compatible and incompatible interactions
Source: PubMed Central journal article supplement (PMC4079953; doi:10.1186/1471-2164-15-497), 2014-06-19
Supplement: 12864_2014_6185_MOESM5_ESM.pdf [file 12864_2014_6185_MOESM5_ESM.pdf]

**Table S4 Protein identifiers for resistance candidates identified in STEM profiles**

Protein ids Fig 6b

PGSC0003DMP400008749  
PGSC0003DMP400023388  
PGSC0003DMP400030376  
PGSC0003DMP400003983  
PGSC0003DMP400046980  
Q9XIB2  
PGSC0003DMP400016669  
PGSC0003DMP400003176  
PGSC0003DMP400027201  
PGSC0003DMP400031346  
PGSC0003DMP400031806  
PGSC0003DMP400041612  
PGSC0003DMP400046178  
PGSC0003DMP400051176

Protein ids Fig 6c

F4K409  
PGSC0003DMP400004610  
PGSC0003DMP400009220  
Q42572  
Q9LVB8  
Q9SKL6  
PGSC0003DMP400012829  
PGSC0003DMP400038531  
PGSC0003DMP400049899  
PGSC0003DMP400063086  
Q9C876  
PGSC0003DMP400017481  
F4IB63  
PGSC0003DMP400003188  
PGSC0003DMP400031840  
PGSC0003DMP400044898  
PGSC0003DMP400048975  
P93814  
PGSC0003DMP400007585  
PGSC0003DMP400016965  
PGSC0003DMP400023730  
PGSC0003DMP400026983  
PGSC0003DMP400027005  
PGSC0003DMP400044902  
PGSC0003DMP400045361  
PGSC0003DMP400054598  
Q9C895  
Q9SPM5

Protein ids Fig 6d

F4HRS0  
PGSC0003DMP400062387

PGSC0003DMP400048151

PGSC0003DMP400024741

Q9FZB1

PGSC0003DMP400007260

PGSC0003DMP400012143

PGSC0003DMP400043899
