# Supplementary material for: Quantitative proteomics and transcriptomics of potato in response to Phytophthora infestans in compatible and incompatible interactions
Source: PubMed Central journal article supplement (PMC4079953; doi:10.1186/1471-2164-15-497), 2014-06-19
Supplement: 12864_2014_6185_MOESM7_ESM.pdf [file 12864_2014_6185_MOESM7_ESM.pdf]

Secretome LC-MS data files

| File Name                | Uniform Resource Identifier                                                                                                                                                             | Size (bytes) | MDS                               |
|--------------------------|-----------------------------------------------------------------------------------------------------------------------------------------------------------------------------------------|--------------|-----------------------------------|
| 111202_FL_A10_01.mzML.gz | <a href="http://srm.swegrid.se/snic/bils/lu/teomics/orbi/mzml/201112/111202_FL_A10_01.mzML.gz">http://srm.swegrid.se/snic/bils/lu/teomics/orbi/mzml/201112/111202_FL_A10_01.mzML.gz</a> | 1136045993   | ff7fdb261742aaa3ac7fc2c63695d5db  |
| 111202_FL_A11_01.mzML.gz | <a href="http://srm.swegrid.se/snic/bils/lu/teomics/orbi/mzml/201112/111202_FL_A11_01.mzML.gz">http://srm.swegrid.se/snic/bils/lu/teomics/orbi/mzml/201112/111202_FL_A11_01.mzML.gz</a> | 1176849774   | 240ed13ab75ea17b2b639c048e67f0dc  |
| 111202_FL_A12_01.mzML.gz | <a href="http://srm.swegrid.se/snic/bils/lu/teomics/orbi/mzml/201112/111202_FL_A12_01.mzML.gz">http://srm.swegrid.se/snic/bils/lu/teomics/orbi/mzml/201112/111202_FL_A12_01.mzML.gz</a> | 1190350642   | 7219e85eae74d8ec400ad0fe572434f8  |
| 111202_FL_A5_01.mzML.gz  | <a href="http://srm.swegrid.se/snic/bils/lu/teomics/orbi/mzml/201112/111202_FL_A5_01.mzML.gz">http://srm.swegrid.se/snic/bils/lu/teomics/orbi/mzml/201112/111202_FL_A5_01.mzML.gz</a>   | 1215666535   | 0993c75eada6444cd60c7b9f5eaa5b6   |
| 111202_FL_A6_01.mzML.gz  | <a href="http://srm.swegrid.se/snic/bils/lu/teomics/orbi/mzml/201112/111202_FL_A6_01.mzML.gz">http://srm.swegrid.se/snic/bils/lu/teomics/orbi/mzml/201112/111202_FL_A6_01.mzML.gz</a>   | 1099872541   | b23d7f037f8636635cca7f10d99e0b3   |
| 111202_FL_A7_01.mzML.gz  | <a href="http://srm.swegrid.se/snic/bils/lu/teomics/orbi/mzml/201112/111202_FL_A7_01.mzML.gz">http://srm.swegrid.se/snic/bils/lu/teomics/orbi/mzml/201112/111202_FL_A7_01.mzML.gz</a>   | 1131164127   | b11427a2cbcd0667e9bc22f689d7c68a  |
| 111202_FL_A8_01.mzML.gz  | <a href="http://srm.swegrid.se/snic/bils/lu/teomics/orbi/mzml/201112/111202_FL_A8_01.mzML.gz">http://srm.swegrid.se/snic/bils/lu/teomics/orbi/mzml/201112/111202_FL_A8_01.mzML.gz</a>   | 1158489491   | 543038be2cf0159fdb999acec034dc3c  |
| 111202_FL_A9_01.mzML.gz  | <a href="http://srm.swegrid.se/snic/bils/lu/teomics/orbi/mzml/201112/111202_FL_A9_01.mzML.gz">http://srm.swegrid.se/snic/bils/lu/teomics/orbi/mzml/201112/111202_FL_A9_01.mzML.gz</a>   | 1207851722   | b6950614193f9f0f4282f31432bbf017  |
| 111202_FL_B1_01.mzML.gz  | <a href="http://srm.swegrid.se/snic/bils/lu/teomics/orbi/mzml/201112/111202_FL_B1_01.mzML.gz">http://srm.swegrid.se/snic/bils/lu/teomics/orbi/mzml/201112/111202_FL_B1_01.mzML.gz</a>   | 1156024957   | 5ecc8c6d6f7b077232f27f7be304f9ada |
| 111202_FL_B2_01.mzML.gz  | <a href="http://srm.swegrid.se/snic/bils/lu/teomics/orbi/mzml/201112/111202_FL_B2_01.mzML.gz">http://srm.swegrid.se/snic/bils/lu/teomics/orbi/mzml/201112/111202_FL_B2_01.mzML.gz</a>   | 1135104343   | e621fe45434a920aa687c8ff86863016  |
| 111202_FL_B3_01.mzML.gz  | <a href="http://srm.swegrid.se/snic/bils/lu/teomics/orbi/mzml/201112/111202_FL_B3_01.mzML.gz">http://srm.swegrid.se/snic/bils/lu/teomics/orbi/mzml/201112/111202_FL_B3_01.mzML.gz</a>   | 1084303452   | 77b5dd8f28e031fcea5804ab73cf56b   |
| 111202_FL_B4_01.mzML.gz  | <a href="http://srm.swegrid.se/snic/bils/lu/teomics/orbi/mzml/201112/111202_FL_B4_01.mzML.gz">http://srm.swegrid.se/snic/bils/lu/teomics/orbi/mzml/201112/111202_FL_B4_01.mzML.gz</a>   | 1135425198   | 04f6a23e34c0d27babda6644f2198435  |
| 111202_FL_B5_01.mzML.gz  | <a href="http://srm.swegrid.se/snic/bils/lu/teomics/orbi/mzml/201112/111202_FL_B5_01.mzML.gz">http://srm.swegrid.se/snic/bils/lu/teomics/orbi/mzml/201112/111202_FL_B5_01.mzML.gz</a>   | 1256088838   | 827e181ba42b0ad12d6f37e1ee0a3402  |
| 111202_FL_B6_01.mzML.gz  | <a href="http://srm.swegrid.se/snic/bils/lu/teomics/orbi/mzml/201112/111202_FL_B6_01.mzML.gz">http://srm.swegrid.se/snic/bils/lu/teomics/orbi/mzml/201112/111202_FL_B6_01.mzML.gz</a>   | 1190169295   | e3b5be647a2320297a88939e9e12936b  |
| 111202_FL_B7_01.mzML.gz  | <a href="http://srm.swegrid.se/snic/bils/lu/teomics/orbi/mzml/201112/111202_FL_B7_01.mzML.gz">http://srm.swegrid.se/snic/bils/lu/teomics/orbi/mzml/201112/111202_FL_B7_01.mzML.gz</a>   | 1100431703   | 9574a9197f0e430593d5f399de7a586f  |
| 111205_FL_A1_02.mzML.gz  | <a href="http://srm.swegrid.se/snic/bils/lu/teomics/orbi/mzml/201112/111205_FL_A1_02.mzML.gz">http://srm.swegrid.se/snic/bils/lu/teomics/orbi/mzml/201112/111205_FL_A1_02.mzML.gz</a>   | 1050715476   | 93f34726b7f4a0972f1e5338346f6dd3  |
| 111205_FL_A2_02.mzML.gz  | <a href="http://srm.swegrid.se/snic/bils/lu/teomics/orbi/mzml/201112/111205_FL_A2_02.mzML.gz">http://srm.swegrid.se/snic/bils/lu/teomics/orbi/mzml/201112/111205_FL_A2_02.mzML.gz</a>   | 1096188626   | 4c8114525f078554650894c3bf521f4   |
| 111205_FL_A3_02.mzML.gz  | <a href="http://srm.swegrid.se/snic/bils/lu/teomics/orbi/mzml/201112/111205_FL_A3_02.mzML.gz">http://srm.swegrid.se/snic/bils/lu/teomics/orbi/mzml/201112/111205_FL_A3_02.mzML.gz</a>   | 1108565762   | 5f099af4562a3a822405dc3daf8a54d3  |
| 111205_FL_A4_02.mzML.gz  | <a href="http://srm.swegrid.se/snic/bils/lu/teomics/orbi/mzml/201112/111205_FL_A4_02.mzML.gz">http://srm.swegrid.se/snic/bils/lu/teomics/orbi/mzml/201112/111205_FL_A4_02.mzML.gz</a>   | 1007839691   | 62f62ef8b9d5bcd440ce70770ae1d5f   |
| 111205_FL_C10_01.mzML.gz | <a href="http://srm.swegrid.se/snic/bils/lu/teomics/orbi/mzml/201112/111205_FL_C10_01.mzML.gz">http://srm.swegrid.se/snic/bils/lu/teomics/orbi/mzml/201112/111205_FL_C10_01.mzML.gz</a> | 1064542814   | 7530ae4dd6e565d9de95bafd1325164c  |
| 111205_FL_C12_01.mzML.gz | <a href="http://srm.swegrid.se/snic/bils/lu/teomics/orbi/mzml/201112/111205_FL_C12_01.mzML.gz">http://srm.swegrid.se/snic/bils/lu/teomics/orbi/mzml/201112/111205_FL_C12_01.mzML.gz</a> | 1055941582   | 482679d59200fda908919988641361b7  |
| 111205_FL_C6_01.mzML.gz  | <a href="http://srm.swegrid.se/snic/bils/lu/teomics/orbi/mzml/201112/111205_FL_C6_01.mzML.gz">http://srm.swegrid.se/snic/bils/lu/teomics/orbi/mzml/201112/111205_FL_C6_01.mzML.gz</a>   | 1038992380   | 661cc47e1d9ec8c53d0e211cf46b4de7  |
| 111206_FL_B10_01.mzML.gz | <a href="http://srm.swegrid.se/snic/bils/lu/teomics/orbi/mzml/201112/111206_FL_B10_01.mzML.gz">http://srm.swegrid.se/snic/bils/lu/teomics/orbi/mzml/201112/111206_FL_B10_01.mzML.gz</a> | 1141389566   | 977c4367b7e8f153c3f0a2f6863587b   |
| 111206_FL_B11_01.mzML.gz | <a href="http://srm.swegrid.se/snic/bils/lu/teomics/orbi/mzml/201112/111206_FL_B11_01.mzML.gz">http://srm.swegrid.se/snic/bils/lu/teomics/orbi/mzml/201112/111206_FL_B11_01.mzML.gz</a> | 1150192251   | e47eb6462f5d252afa0509360530eb7f  |
| 111206_FL_B12_01.mzML.gz | <a href="http://srm.swegrid.se/snic/bils/lu/teomics/orbi/mzml/201112/111206_FL_B12_01.mzML.gz">http://srm.swegrid.se/snic/bils/lu/teomics/orbi/mzml/201112/111206_FL_B12_01.mzML.gz</a> | 1178063735   | 669d145e9d979dc666a8e6572fecfc4   |
| 111206_FL_B8_01.mzML.gz  | <a href="http://srm.swegrid.se/snic/bils/lu/teomics/orbi/mzml/201112/111206_FL_B8_01.mzML.gz">http://srm.swegrid.se/snic/bils/lu/teomics/orbi/mzml/201112/111206_FL_B8_01.mzML.gz</a>   | 1175996507   | 45fc88b1677aece5a70add811978c23   |
| 111206_FL_B9_01.mzML.gz  | <a href="http://srm.swegrid.se/snic/bils/lu/teomics/orbi/mzml/201112/111206_FL_B9_01.mzML.gz">http://srm.swegrid.se/snic/bils/lu/teomics/orbi/mzml/201112/111206_FL_B9_01.mzML.gz</a>   | 1156952624   | 4ea92bc7295239de558566fe81c7f0ab  |
| 111206_FL_C1_01.mzML.gz  | <a href="http://srm.swegrid.se/snic/bils/lu/teomics/orbi/mzml/201112/111206_FL_C1_01.mzML.gz">http://srm.swegrid.se/snic/bils/lu/teomics/orbi/mzml/201112/111206_FL_C1_01.mzML.gz</a>   | 1046270839   | ab8bc64b511c2ab22c343b489e8a6d99  |
| 111206_FL_C2_01.mzML.gz  | <a href="http://srm.swegrid.se/snic/bils/lu/teomics/orbi/mzml/201112/111206_FL_C2_01.mzML.gz">http://srm.swegrid.se/snic/bils/lu/teomics/orbi/mzml/201112/111206_FL_C2_01.mzML.gz</a>   | 1027252391   | c2e936a2a1e5771cd95360abede21023  |
| 111207_FL_C11_01.mzML.gz | <a href="http://srm.swegrid.se/snic/bils/lu/teomics/orbi/mzml/201112/111207_FL_C11_01.mzML.gz">http://srm.swegrid.se/snic/bils/lu/teomics/orbi/mzml/201112/111207_FL_C11_01.mzML.gz</a> | 1087051082   | ef23bdb53ef8925908f5196b8f8b3e96  |
| 111207_FL_C3_01.mzML.gz  | <a href="http://srm.swegrid.se/snic/bils/lu/teomics/orbi/mzml/201112/111207_FL_C3_01.mzML.gz">http://srm.swegrid.se/snic/bils/lu/teomics/orbi/mzml/201112/111207_FL_C3_01.mzML.gz</a>   | 1130054874   | cf71351efa23a58bde928a7324015b38  |
| 111207_FL_C4_01.mzML.gz  | <a href="http://srm.swegrid.se/snic/bils/lu/teomics/orbi/mzml/201112/111207_FL_C4_01.mzML.gz">http://srm.swegrid.se/snic/bils/lu/teomics/orbi/mzml/201112/111207_FL_C4_01.mzML.gz</a>   | 1072961898   | f1b4e259aba0fc6ab5832b9ff466e4be  |
| 111207_FL_C5_01.mzML.gz  | <a href="http://srm.swegrid.se/snic/bils/lu/teomics/orbi/mzml/201112/111207_FL_C5_01.mzML.gz">http://srm.swegrid.se/snic/bils/lu/teomics/orbi/mzml/201112/111207_FL_C5_01.mzML.gz</a>   | 1166818097   | 5a4f1f907d587a7e7b23c08ee6fdcae5  |
| 111207_FL_C7_01.mzML.gz  | <a href="http://srm.swegrid.se/snic/bils/lu/teomics/orbi/mzml/201112/111207_FL_C7_01.mzML.gz">http://srm.swegrid.se/snic/bils/lu/teomics/orbi/mzml/201112/111207_FL_C7_01.mzML.gz</a>   | 1098169221   | 6a593ba1ba7fa8a18a187ac74c655d93  |
| 111207_FL_C8_01.mzML.gz  | <a href="http://srm.swegrid.se/snic/bils/lu/teomics/orbi/mzml/201112/111207_FL_C8_01.mzML.gz">http://srm.swegrid.se/snic/bils/lu/teomics/orbi/mzml/201112/111207_FL_C8_01.mzML.gz</a>   | 1055214463   | 21c9b0f7a1d60e359237f4f1a68ab6af  |
| 111207_FL_C9_01.mzML.gz  | <a href="http://srm.swegrid.se/snic/bils/lu/teomics/orbi/mzml/201112/111207_FL_C9_01.mzML.gz">http://srm.swegrid.se/snic/bils/lu/teomics/orbi/mzml/201112/111207_FL_C9_01.mzML.gz</a>   | 992586521    | b33c58342c184985d3f023ac3aae6d13  |
| 120427_FL_A13_01.mzML.gz | <a href="http://srm.swegrid.se/snic/bils/lu/teomics/orbi/mzml/201204/120427_FL_A13_01.mzML.gz">http://srm.swegrid.se/snic/bils/lu/teomics/orbi/mzml/201204/120427_FL_A13_01.mzML.gz</a> | 1116882353   | f8ab06e611d7000b5c6556fd3a2d87d3  |
| 120427_FL_A14_01.mzML.gz | <a href="http://srm.swegrid.se/snic/bils/lu/teomics/orbi/mzml/201204/120427_FL_A14_01.mzML.gz">http://srm.swegrid.se/snic/bils/lu/teomics/orbi/mzml/201204/120427_FL_A14_01.mzML.gz</a> | 1121152452   | c6f20ba86a68bea1822b0dbe34919d02  |
| 120427_FL_A15_01.mzML.gz | <a href="http://srm.swegrid.se/snic/bils/lu/teomics/orbi/mzml/201204/120427_FL_A15_01.mzML.gz">http://srm.swegrid.se/snic/bils/lu/teomics/orbi/mzml/201204/120427_FL_A15_01.mzML.gz</a> | 1068253382   | 59118b169bf4e3e361a7c445900cd81d  |
| 120427_FL_A16_01.mzML.gz | <a href="http://srm.swegrid.se/snic/bils/lu/teomics/orbi/mzml/201204/120427_FL_A16_01.mzML.gz">http://srm.swegrid.se/snic/bils/lu/teomics/orbi/mzml/201204/120427_FL_A16_01.mzML.gz</a> | 974874313    | 638a0c6656dff9e3a6efad527b00c6    |
| 120427_FL_A17_01.mzML.gz | <a href="http://srm.swegrid.se/snic/bils/lu/teomics/orbi/mzml/201204/120427_FL_A17_01.mzML.gz">http://srm.swegrid.se/snic/bils/lu/teomics/orbi/mzml/201204/120427_FL_A17_01.mzML.gz</a> | 1011353135   | 188f05521de46e251a517f77cc0e6303  |
| 120427_FL_A18_01.mzML.gz | <a href="http://srm.swegrid.se/snic/bils/lu/teomics/orbi/mzml/201204/120427_FL_A18_01.mzML.gz">http://srm.swegrid.se/snic/bils/lu/teomics/orbi/mzml/201204/120427_FL_A18_01.mzML.gz</a> | 1008258550   | de77a3615ad813cb51bb404acd1b805   |
| 120427_FL_A19_01.mzML.gz | <a href="http://srm.swegrid.se/snic/bils/lu/teomics/orbi/mzml/201204/120427_FL_A19_01.mzML.gz">http://srm.swegrid.se/snic/bils/lu/teomics/orbi/mzml/201204/120427_FL_A19_01.mzML.gz</a> | 1047517367   | c43a185245b99824229a9462f45494e4  |
| 120427_FL_A20_01.mzML.gz | <a href="http://srm.swegrid.se/snic/bils/lu/teomics/orbi/mzml/201204/120427_FL_A20_01.mzML.gz">http://srm.swegrid.se/snic/bils/lu/teomics/orbi/mzml/201204/120427_FL_A20_01.mzML.gz</a> | 981146661    | 805214b108fac307f99aa110313220d1  |
| 120427_FL_B13_01.mzML.gz | <a href="http://srm.swegrid.se/snic/bils/lu/teomics/orbi/mzml/201204/120427_FL_B13_01.mzML.gz">http://srm.swegrid.se/snic/bils/lu/teomics/orbi/mzml/201204/120427_FL_B13_01.mzML.gz</a> | 1090576857   | 26c8d227c199d68b1cd7842a0f323a7b  |
| 120427_FL_B14_01.mzML.gz | <a href="http://srm.swegrid.se/snic/bils/lu/teomics/orbi/mzml/201204/120427_FL_B14_01.mzML.gz">http://srm.swegrid.se/snic/bils/lu/teomics/orbi/mzml/201204/120427_FL_B14_01.mzML.gz</a> | 1144565982   | 21dbb452c5c9baad6fbd584f298488d0  |
| 120427_FL_B15_01.mzML.gz | <a href="http://srm.swegrid.se/snic/bils/lu/teomics/orbi/mzml/201204/120427_FL_B15_01.mzML.gz">http://srm.swegrid.se/snic/bils/lu/teomics/orbi/mzml/201204/120427_FL_B15_01.mzML.gz</a> | 1049283906   | 2e95022cfff6d89d985773f1e9ec9e72  |
| 120427_FL_B16_01.mzML.gz | <a href="http://srm.swegrid.se/snic/bils/lu/teomics/orbi/mzml/201204/120427_FL_B16_01.mzML.gz">http://srm.swegrid.se/snic/bils/lu/teomics/orbi/mzml/201204/120427_FL_B16_01.mzML.gz</a> | 999432811    | 488833e12d8316376c1718d803f0712   |
| 120427_FL_B17_01.mzML.gz | <a href="http://srm.swegrid.se/snic/bils/lu/teomics/orbi/mzml/201204/120427_FL_B17_01.mzML.gz">http://srm.swegrid.se/snic/bils/lu/teomics/orbi/mzml/201204/120427_FL_B17_01.mzML.gz</a> | 1008804559   | c65821b937dc6c6a8f2aa822da0c6b14  |
| 120427_FL_B18_01.mzML.gz | <a href="http://srm.swegrid.se/snic/bils/lu/teomics/orbi/mzml/201204/120427_FL_B18_01.mzML.gz">http://srm.swegrid.se/snic/bils/lu/teomics/orbi/mzml/201204/120427_FL_B18_01.mzML.gz</a> | 1059384358   | e3a777e1d22f09884a4954e0d66f253f  |
| 120427_FL_B19_01.mzML.gz | <a href="http://srm.swegrid.se/snic/bils/lu/teomics/orbi/mzml/201204/120427_FL_B19_01.mzML.gz">http://srm.swegrid.se/snic/bils/lu/teomics/orbi/mzml/201204/120427_FL_B19_01.mzML.gz</a> | 1023420253   | 0ec721bd94ddc939b00a53f65a0601c   |
| 120427_FL_B20_01.mzML.gz | <a href="http://srm.swegrid.se/snic/bils/lu/teomics/orbi/mzml/201204/120427_FL_B20_01.mzML.gz">http://srm.swegrid.se/snic/bils/lu/teomics/orbi/mzml/201204/120427_FL_B20_01.mzML.gz</a> | 957751314    | b8f8d031601f777e82ff6cd4402856    |
| 120427_FL_C13_01.mzML.gz | <a href="http://srm.swegrid.se/snic/bils/lu/teomics/orbi/mzml/201204/120427_FL_C13_01.mzML.gz">http://srm.swegrid.se/snic/bils/lu/teomics/orbi/mzml/201204/120427_FL_C13_01.mzML.gz</a> | 1073720716   | 9d1f5f991f3020b3b552f3fa9719e99   |
| 120427_FL_C14_01.mzML.gz | <a href="http://srm.swegrid.se/snic/bils/lu/teomics/orbi/mzml/201204/120427_FL_C14_01.mzML.gz">http://srm.swegrid.se/snic/bils/lu/teomics/orbi/mzml/201204/120427_FL_C14_01.mzML.gz</a> | 1079872629   | 80b6326494a411be386d06841c22a0ff  |
| 120427_FL_C15_01.mzML.gz | <a href="http://srm.swegrid.se/snic/bils/lu/teomics/orbi/mzml/201204/120427_FL_C15_01.mzML.gz">http://srm.swegrid.se/snic/bils/lu/teomics/orbi/mzml/201204/120427_FL_C15_01.mzML.gz</a> | 997739642    | a052ee403c7473f010c26006ff2147d   |
| 120427_FL_C16_01.mzML.gz | <a href="http://srm.swegrid.se/snic/bils/lu/teomics/orbi/mzml/201204/120427_FL_C16_01.mzML.gz">http://srm.swegrid.se/snic/bils/lu/teomics/orbi/mzml/201204/120427_FL_C16_01.mzML.gz</a> | 982607852    | d717e6b9ff27a8050c0254bf7c5c3449  |
| 120427_FL_C17_01.mzML.gz | <a href="http://srm.swegrid.se/snic/bils/lu/teomics/orbi/mzml/201204/120427_FL_C17_01.mzML.gz">http://srm.swegrid.se/snic/bils/lu/teomics/orbi/mzml/201204/120427_FL_C17_01.mzML.gz</a> | 979996961    | 5fb0b55690daa3c41d9e7ef2b18aa28   |
| 120427_FL_C18_01.mzML.gz | <a href="http://srm.swegrid.se/snic/bils/lu/teomics/orbi/mzml/201204/120427_FL_C18_01.mzML.gz">http://srm.swegrid.se/snic/bils/lu/teomics/orbi/mzml/201204/120427_FL_C18_01.mzML.gz</a> | 1028012622   | f5483b0d09373c03889530ad38dd2bbf  |
| 120427_FL_C19_01.mzML.gz | <a href="http://srm.swegrid.se/snic/bils/lu/teomics/orbi/mzml/201204/120427_FL_C19_01.mzML.gz">http://srm.swegrid.se/snic/bils/lu/teomics/orbi/mzml/201204/120427_FL_C19_01.mzML.gz</a> | 1042220055   | 003ee02cfc60a54349206691904dac62  |
| 120427_FL_C20_01.mzML.gz | <a href="http://srm.swegrid.se/snic/bils/lu/teomics/orbi/mzml/201204/120427_FL_C20_01.mzML.gz">http://srm.swegrid.se/snic/bils/lu/teomics/orbi/mzml/201204/120427_FL_C20_01.mzML.gz</a> | 1022715759   | 1828f1e5d4fe346d52a00ed1933f9b96  |
